# Supplementary material for: Mathematical Modeling Identifies Optimum Palbociclib-fulvestrant Dose Administration Schedules for the Treatment of Patients with Estrogen Receptor–positive Breast Cancer
Source: PubMed Central journal article supplement (PMC10652811; doi:10.1158/2767-9764.crc-23-0257), 2023-11-16

**Fig. S4 Using LOOIC to determine number of stages  $m$ .** LOOIC comparison among different  $m$  for (A) -DOX and (B) +DOX cells. The values were rescaled: The best model was set to zero. Having more negative values means the model has worse prediction. (A) shows  $m = 8$  is the best model for -DOX and (B) shows  $m = 2$  is the best model for +DOX in terms of model predictions. (C) and (D) are the cartoon-like figures for visualizing the most probable number of subphases of each phase for -DOX and +DOX cells, respectively.

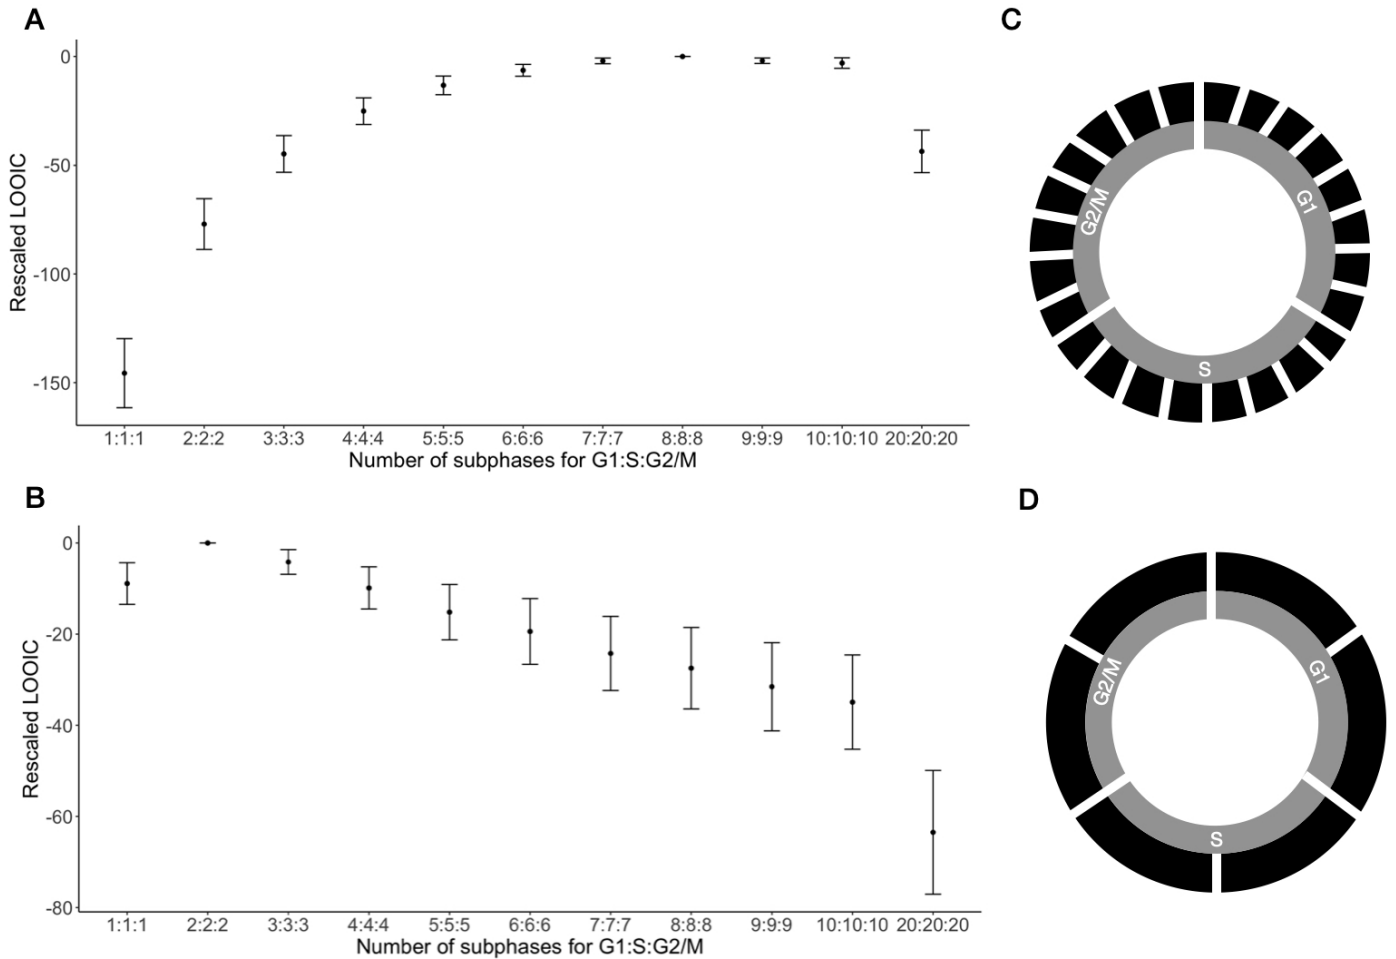

Supplement: crc-23-0257-s04.pdf [file crc-23-0257-s04.pdf]
