# Supplementary material for: Mathematical Modeling Identifies Optimum Palbociclib-fulvestrant Dose Administration Schedules for the Treatment of Patients with Estrogen Receptor–positive Breast Cancer
Source: PubMed Central journal article supplement (PMC10652811; doi:10.1158/2767-9764.crc-23-0257), 2023-11-16

**Fig. S9** *In silico* trial predictions of multiple palbociclib treatment administration schedules in combination with fulvestrant. Each panel represents the plasma concentration of (A) fulvestrant and (B) palbociclib for each treatments schedule given by the table.

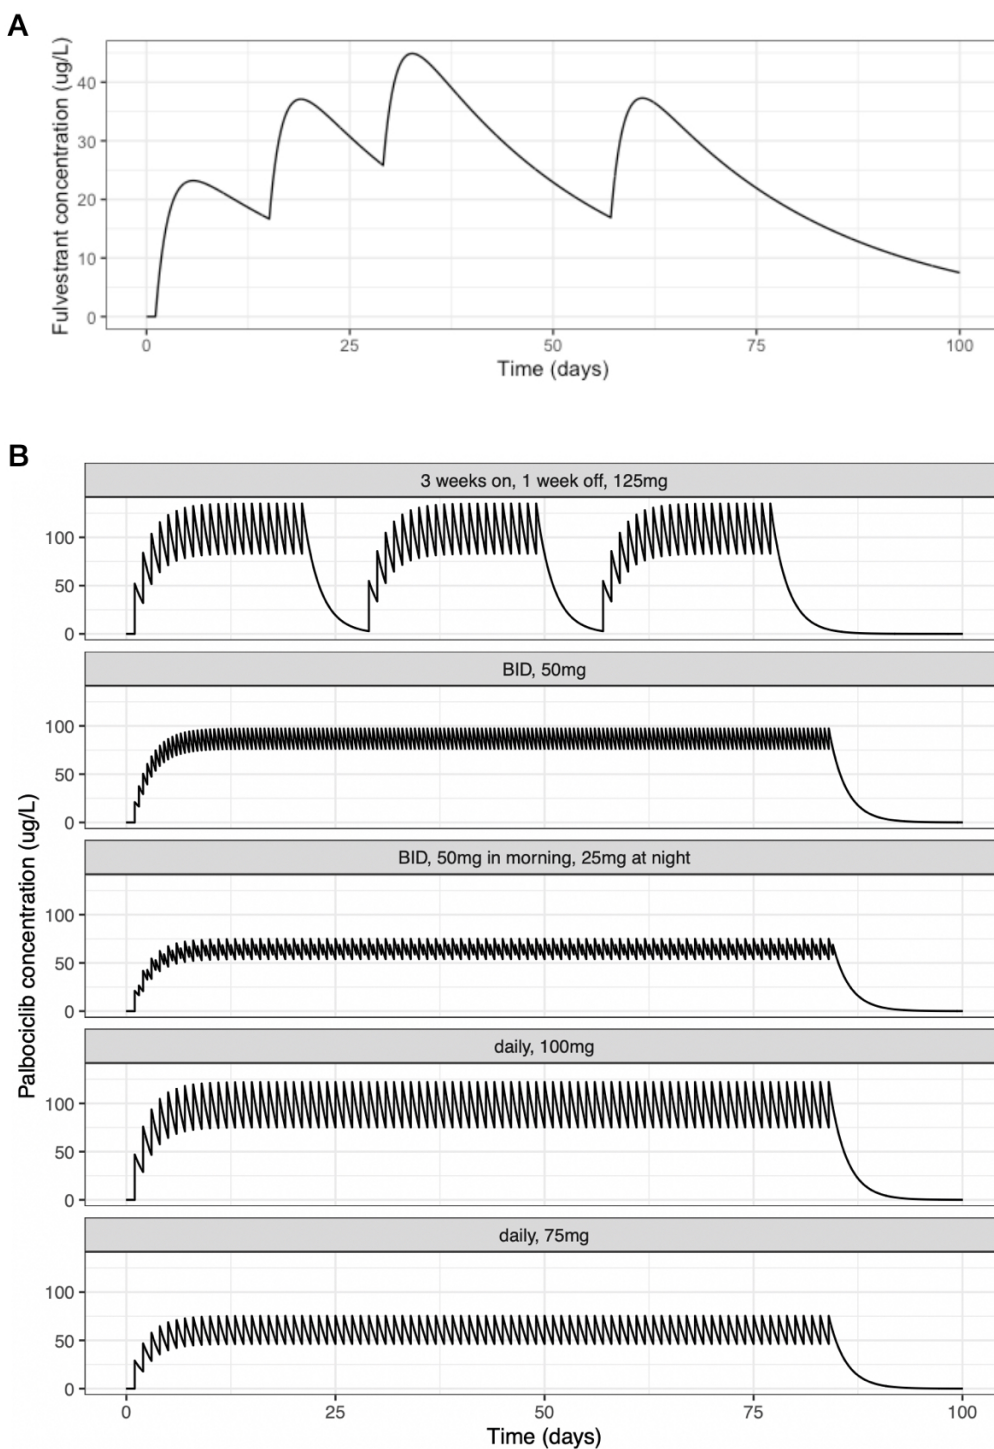

Supplement: crc-23-0257-s09.pdf [file crc-23-0257-s09.pdf]
