# Supplementary material for: Mathematical Modeling Identifies Optimum Palbociclib-fulvestrant Dose Administration Schedules for the Treatment of Patients with Estrogen Receptor–positive Breast Cancer
Source: PubMed Central journal article supplement (PMC10652811; doi:10.1158/2767-9764.crc-23-0257), 2023-11-16

**Fig. S13** *In silico* simulation of new cell lines - 1 (A) for -DOX cells and (B) for +DOX cells are the standard box plots for the number of cells at day 100. From left to right, we varied the untreated G1-S transition from the original cell line (MCF7) by giving different weights (0.2, 0.6, 1.0, 1.4, 2.0) of the original parameter  $\lambda_\alpha$ . In x-axis, G denotes the weight of G1-S growth rate, B denotes the weight of the slope of palbociclib response curve, and C denotes the weight of the half maximal inhibitory concentration (G1/S-TR50) of palbociclib response curve.

Schedule  3 weeks on, 1 week off, 125mg  BID, 50mg  BID, 50mg in morning, 25mg at night  daily, 100mg  daily, 75mg

**A**

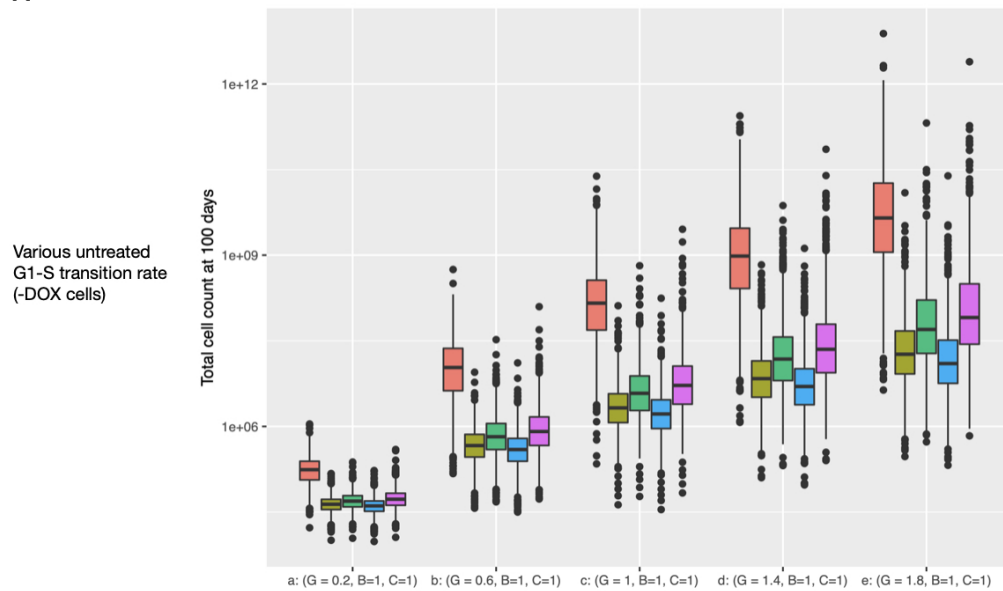

**B**

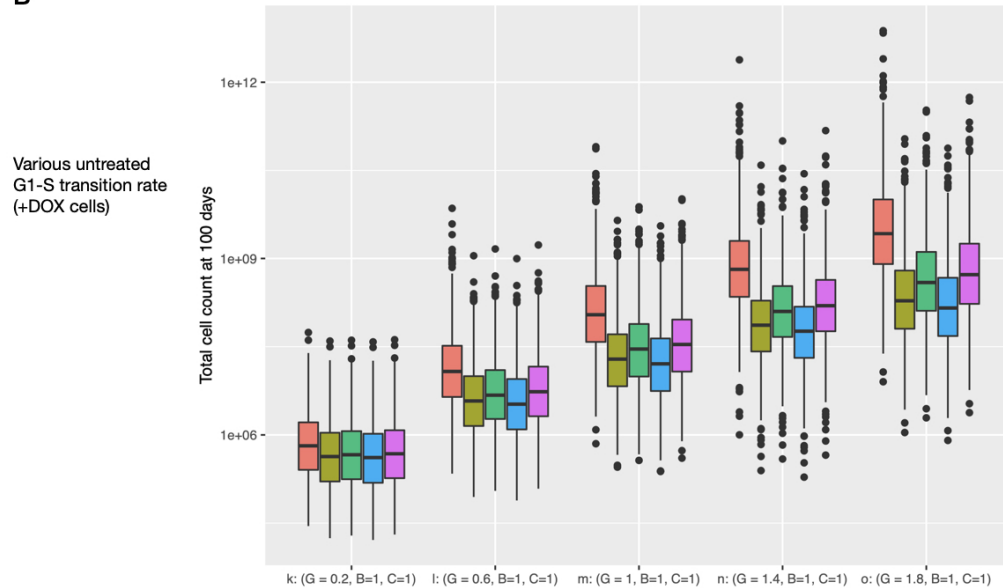

Supplement: crc-23-0257-s13.pdf [file crc-23-0257-s13.pdf]
