# Supplementary material for: Mathematical Modeling Identifies Optimum Palbociclib-fulvestrant Dose Administration Schedules for the Treatment of Patients with Estrogen Receptor–positive Breast Cancer
Source: PubMed Central journal article supplement (PMC10652811; doi:10.1158/2767-9764.crc-23-0257), 2023-11-16

**Fig. S16** *In silico* trial predictions of the cell count at day 100 with initial tumor heterogeneity. (A) for the original cell line (MCF7) (B) for a simulated cell line with a high untreated G1-S transition rate ( $1.8 * \lambda_{\alpha}$ ) (C) for a simulate cell line with high palbociclib resistance ( $10 * c_P$ ). (A)-(C) are the standard box plots for the number of cells at day 100 with different degrees of initial tumor heterogeneity at day 0. From left to right, a: 100% -DOX cells, b: 80% -DOX cells + 20% +DOX cells, c: 50% -DOX cells + 50% +DOX cells, d: 20% -DOX cells + 80% +DOX cells, e: 100% +DOX cells.

Schedule 3 weeks on, 1 week off, 125mg BID, 50mg BID, 50mg in morning, 25mg at night daily, 100mg daily, 75mg

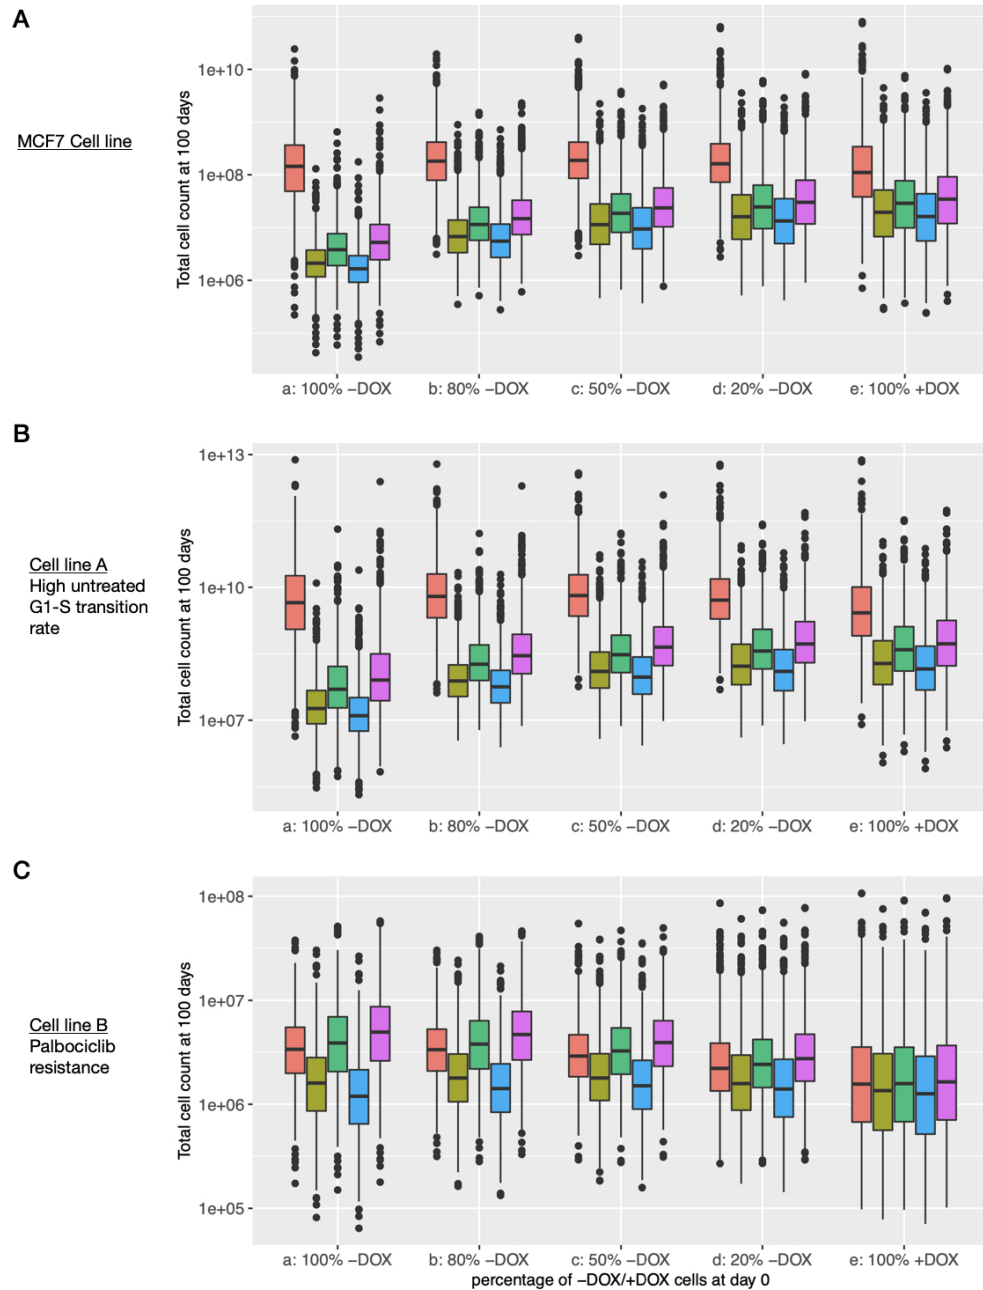

Supplement: crc-23-0257-s16.pdf [file crc-23-0257-s16.pdf]
