# Supplementary material for: Mathematical Modeling Identifies Optimum Palbociclib-fulvestrant Dose Administration Schedules for the Treatment of Patients with Estrogen Receptor–positive Breast Cancer
Source: PubMed Central journal article supplement (PMC10652811; doi:10.1158/2767-9764.crc-23-0257), 2023-11-16
Supplement: crc-23-0257-s17.pdf [file crc-23-0257-s17.pdf]

**Table. S1 Parameter distributions for model inference.** All rates are in  $\text{day}^{-1}$ ; the unit of fulvestrant doses (i.e.  $c_F$ ) is  $10^{-5}$  nM for -DOX cells and nM for +DOX cells; the unit of palbociclib doses (i.e.  $c_P$ ) is 10 nM. Furthermore, some parameters in the effective drug dose model are rescaled in the following way:  $b_F$  is rescaled by  $0.1b_F$  in the model of -DOX cells;  $\lambda_\alpha^{(max)}$  is rescaled by  $0.1\lambda_\alpha^{(max)}$  in the model of -DOX cells; the interaction parameter  $a_{FP}$  is rescaled by  $0.1a_{FP}$  in the model of both -DOX and +DOX cells. Note that para. is a short notation of parameter and *lnorm* represents the Log-normal distribution.

| Para.                    | Description                                                    | Prior Distribution   |                      | Lower bound | Upper bound | Initial distribution                      |                                          |
|--------------------------|----------------------------------------------------------------|----------------------|----------------------|-------------|-------------|-------------------------------------------|------------------------------------------|
| $\lambda_\alpha$         | G0/G1 sub-phases transition rate and G0/G1 to S rate (no drug) | $N(16, 2)$ for -DOX  | $N(4, 2)$ for +DOX   | 0           | $\infty$    | <i>lnorm</i> (1, $\log(16)$ , 1) for -DOX | <i>lnorm</i> (1, $\log(4)$ , 1) for +DOX |
| $\lambda_\alpha^{(max)}$ | G0/G1 to S rate (infinite drug)                                | $N(1, 1)$            |                      | 0           | $\infty$    | <i>lnorm</i> (1, $\log(0.1)$ , 0.1)       |                                          |
| $\lambda_\beta$          | S subphases transition rate and S to G2/M rate                 | $N(16, 2)$ for -DOX  | $N(4, 2)$ for +DOX   | 0           | $\infty$    | <i>lnorm</i> (1, $\log(16)$ , 1) for -DOX | <i>lnorm</i> (1, $\log(4)$ , 1) for +DOX |
| $\lambda_\gamma$         | G2/M sub-phases transition rate and G2/M to G0/G1 rate         | $N(16, 2)$ for -DOX  | $N(4, 2)$ for +DOX   | 0           | $\infty$    | <i>lnorm</i> (1, $\log(16)$ , 1) for -DOX | <i>lnorm</i> (1, $\log(4)$ , 1) for +DOX |
| $b_P$                    | Palbociclib response steepness                                 | $N(1, 1)$            |                      | 0           | $\infty$    | <i>lnorm</i> (1, $\log(1)$ , 1)           |                                          |
| $b_F$                    | Fulvestrant response steepness                                 | $N(1, 1)$            |                      | 0           | $\infty$    | <i>lnorm</i> (1, $\log(1)$ , 1)           |                                          |
| $c_P$                    | 50% effect dose of palbociclib                                 | $N(1, 1)$            |                      | 0           | $\infty$    | <i>lnorm</i> (1, $\log(1)$ , 1)           |                                          |
| $c_F$                    | 50% effect dose of fulvestrant                                 | $N(1, 1.0)$ for -DOX | $N(1, 0.5)$ for +DOX | 0           | $\infty$    | <i>lnorm</i> (1, $\log(1)$ , 1)           |                                          |
| $a_{FP}$                 | 50% Drug interaction                                           | $N(-1, 1)$           |                      | $-\infty$   | $\infty$    | $-$ <i>lnorm</i> (1, $\log(1)$ , 1)       |                                          |
| $\sigma_\alpha$          | G0/G1 sampling variance                                        | <i>cauchy</i> (0, 1) |                      | 0           | $\infty$    | <i>abs</i> ( <i>N</i> (1, 0.1))           |                                          |
| $\sigma_\beta$           | S sampling variance                                            | <i>cauchy</i> (0, 1) |                      | 0           | $\infty$    | <i>abs</i> ( <i>N</i> (1, 0.1))           |                                          |
| $\sigma_\gamma$          | G2/M sampling variance                                         | <i>cauchy</i> (0, 1) |                      | 0           | $\infty$    | <i>abs</i> ( <i>N</i> (1, 0.1))           |                                          |
| $\sigma_T$               | Total count sampling variance                                  | <i>cauchy</i> (0, 1) |                      | 0           | $\infty$    | <i>abs</i> ( <i>N</i> (1, 0.1))           |                                          |
