# Supplementary material for: Mathematical Modeling Identifies Optimum Palbociclib-fulvestrant Dose Administration Schedules for the Treatment of Patients with Estrogen Receptor–positive Breast Cancer
Source: PubMed Central journal article supplement (PMC10652811; doi:10.1158/2767-9764.crc-23-0257), 2023-11-16
Supplement: crc-23-0257-s22.pdf [file crc-23-0257-s22.pdf]

### Appendix. S3 Multistage model versus logistic model.

To include the effect of carry capacity, we can use the a three-compartment system of ordinary differential equations representing the G0/G1, S, and G2/M phases with logistic growth in each phase, given by

$$\begin{aligned}
 T &= x_\alpha(t) + x_\beta(t) + x_\gamma(t), \\
 \frac{dx_\alpha(t)}{dt} &= 2\lambda_\gamma x_\gamma \left(1 - \frac{T}{K}\right) - \lambda_\alpha^*(d_F, d_P)x_\alpha \left(1 - \frac{T}{K}\right), \\
 \frac{dx_\beta(t)}{dt} &= \lambda_\alpha^*(d_F, d_P)x_\alpha \left(1 - \frac{T}{K}\right) - \lambda_\beta x_\beta \left(1 - \frac{T}{K}\right), \\
 \frac{dx_\gamma(t)}{dt} &= \lambda_\beta x_\beta \left(1 - \frac{T}{K}\right) - \lambda_\gamma x_\gamma \left(1 - \frac{T}{K}\right),
 \end{aligned} \tag{1}$$

where  $x_\alpha$ ,  $x_\beta$ , and  $x_\gamma$  represent the number of cells in G1, S, and G2/M phases of the cell cycle, respectively;  $\lambda_\gamma$  denotes the G2/M to G1 transition rate ( $\text{day}^{-1}$ );  $\lambda_\alpha^*(d_F, d_P)$  following

$$\lambda_\alpha^*(d_F, d_P) = \lambda_\alpha^{(max)} + (\lambda_\alpha - \lambda_\alpha^{(max)})r_F(d_F)r_P(d_P), \tag{2}$$

denotes the dose dependent G1 to S transition rate ( $\text{day}^{-1}$ ) where  $d_F$  and  $d_P$  are the concentrations of fulvestrant and palbociclib, respectively;  $\lambda_\beta$  represents the S to G2/M transition rate ( $\text{day}^{-1}$ ); and  $K$  represents the carrying capacity (number of cells).

Then we used the model comparison (LOOIC) to compare the logistic growth model given by (1) and the multistage model given by

$$\begin{aligned}
 \frac{dx_\alpha(t)}{dt} &= 2\lambda_\gamma x_{3m}(t) - \lambda_\alpha^*(d_F, d_P)x_m(t), \\
 \frac{dx_\beta(t)}{dt} &= \lambda_\alpha^*(d_F, d_P)x_m(t) - \lambda_\beta x_{2m}(t), \\
 \frac{dx_\gamma(t)}{dt} &= \lambda_\beta x_{2m}(t) - \lambda_\gamma x_{3m}(t).
 \end{aligned} \tag{3}$$

Two models have the same number of parameters: the only difference is that the logistic growth model has  $K$  for the carry capacity but the multistage model has  $m$  for the number of subphases. All of the rest of parameters are the same. So we have a similar model complexity (the same dimension of parameter space), which makes the model comparison reliable [1]. Our result of model comparison suggested that the multistage model is better than the logistic growth model in terms of predictive analytics, for both -DOX and +DOX cells. See Table 1.

**Table 1. Model comparison by LOOIC.**

|      | Logistic model | Multistage model |
|------|----------------|------------------|
| -DOX | -2209.5        | -2239            |
| +DOX | -1776          | -2057.3          |

The values are given by  $\text{LOOIC} = -2\text{epld}_{\text{loo}}$ , where  $\text{epld}_{\text{loo}}$  represents the Bayesian LOO estimate of expected log predictive density. Since there is a factor  $-2$  in the formula (historical reasons), a smaller, more negative number indicates of LOOIC better predictions [2].

## References

1. McElreath R. Statistical rethinking: A Bayesian course with examples in R and Stan. Chapman and Hall/CRC; 2020.
2. Vehtari A, Gelman A, Gabry J. Practical Bayesian model evaluation using leave-one-out cross-validation and WAIC. *Statistics and computing*. 2017;27(5):1413–1432.
